# Supplementary material for: Complement inhibition decreases early fibrogenic events in the lung of septic baboons
Source: PubMed Central journal article supplement (PMC4627561; doi:10.1111/jcmm.12667), 2015-09-03
Supplement: jcmm0019-2549-sd1.pdf [file jcmm0019-2549-sd1.pdf]

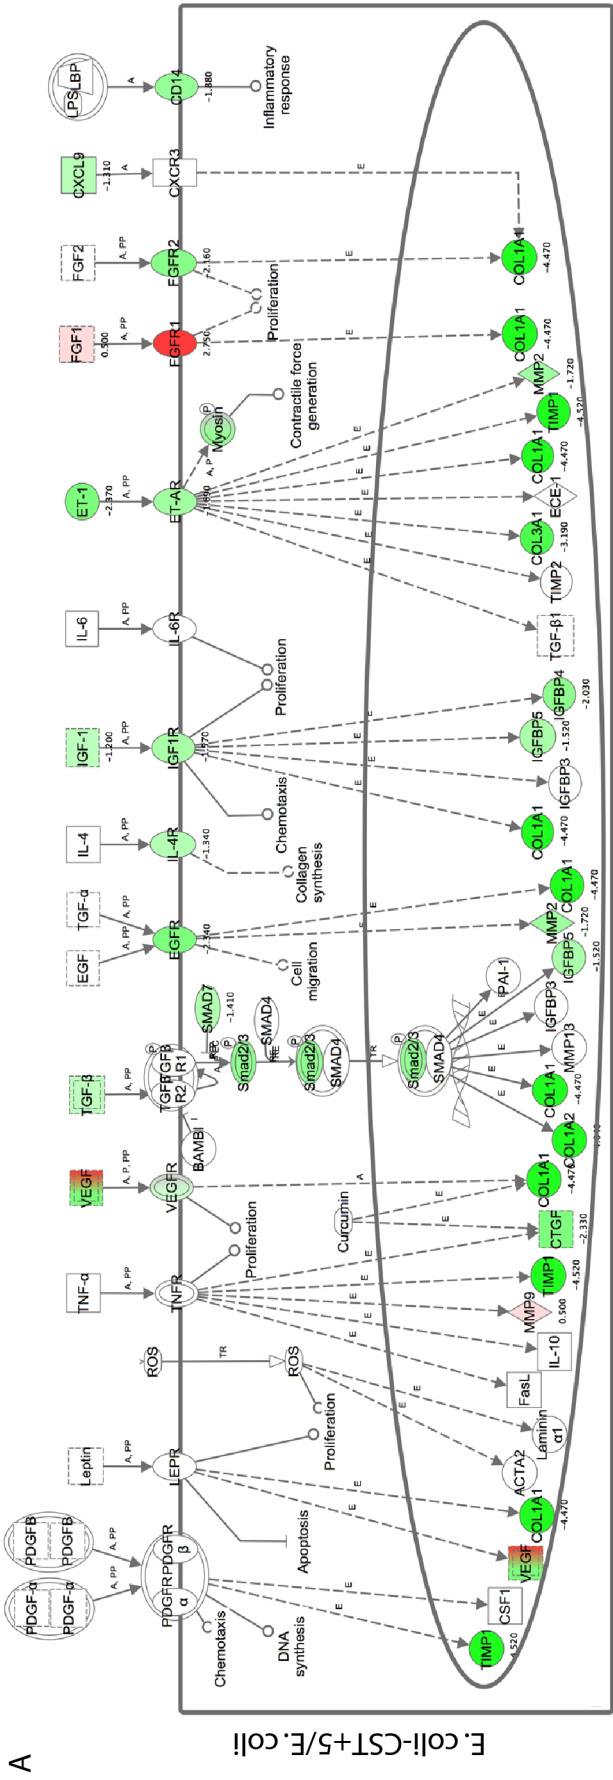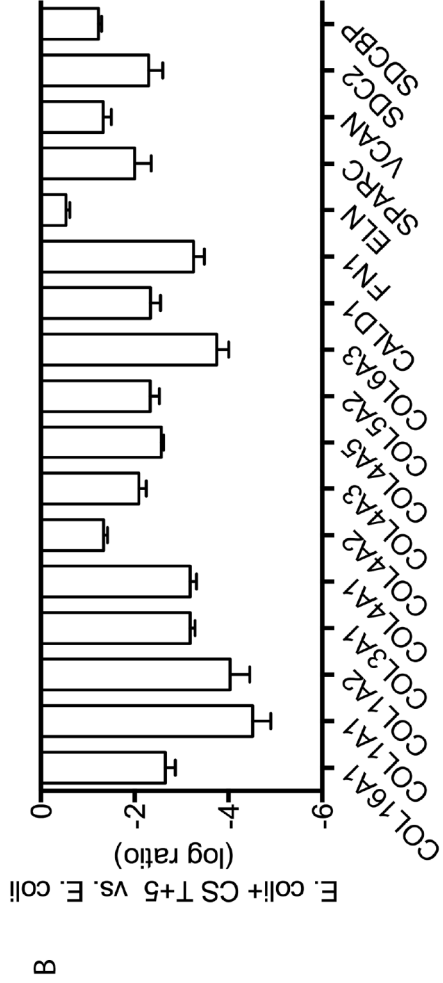

**Figure E1. Compstatin treatment prevents sepsis-induced upregulation of matrix proteins in the lung.** (A): IPA canonical pathway analysis reveals that compstatin (CS) treatment during the second stage of *E. coli* sepsis (*E. coli* +CS T + 5) leads to downregulation (green) of several sepsis-induced signaling pathways involved in fibrosis, including TGF- $\beta$ , EGF, IGF, endothelin-1 (ET1) and FGF. (B): Log ratio representation of multiple extracellular matrix genes, including 10 collagens, fibronectin (FN1), elastin (ELN), versican (VCAN), syndecan 2 (SDC2) and syndecan binding protein, all downregulated by compstatin during the second stage of sepsis (*E. coli* +CS T + 5). Data are shown as log ratio mean  $\pm$  SEM of 3 biological replicates.

A

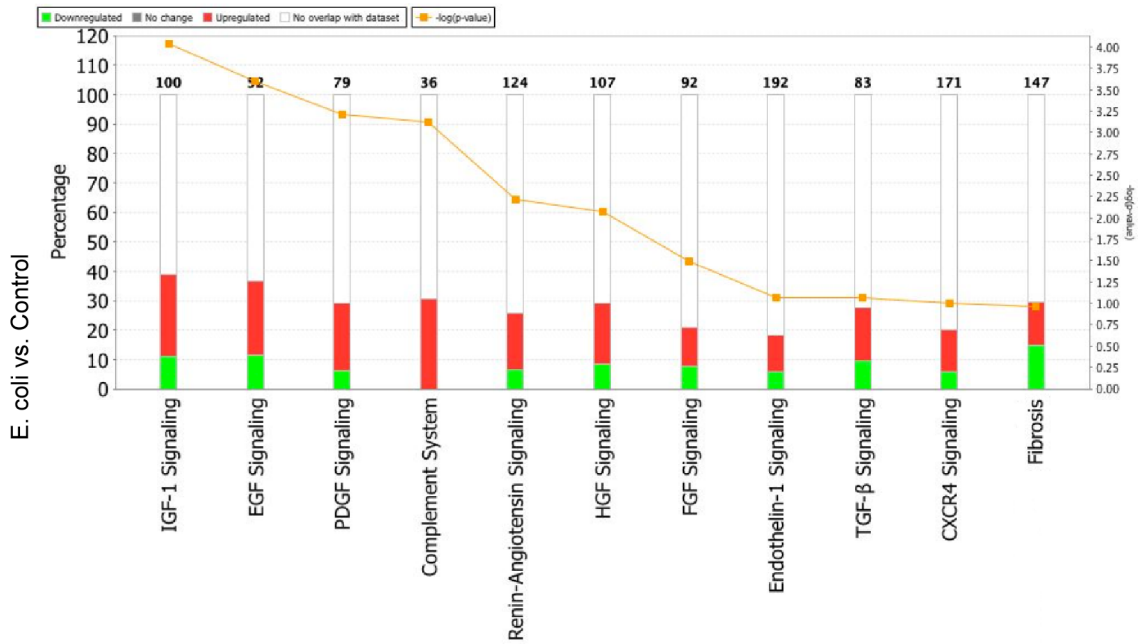

B

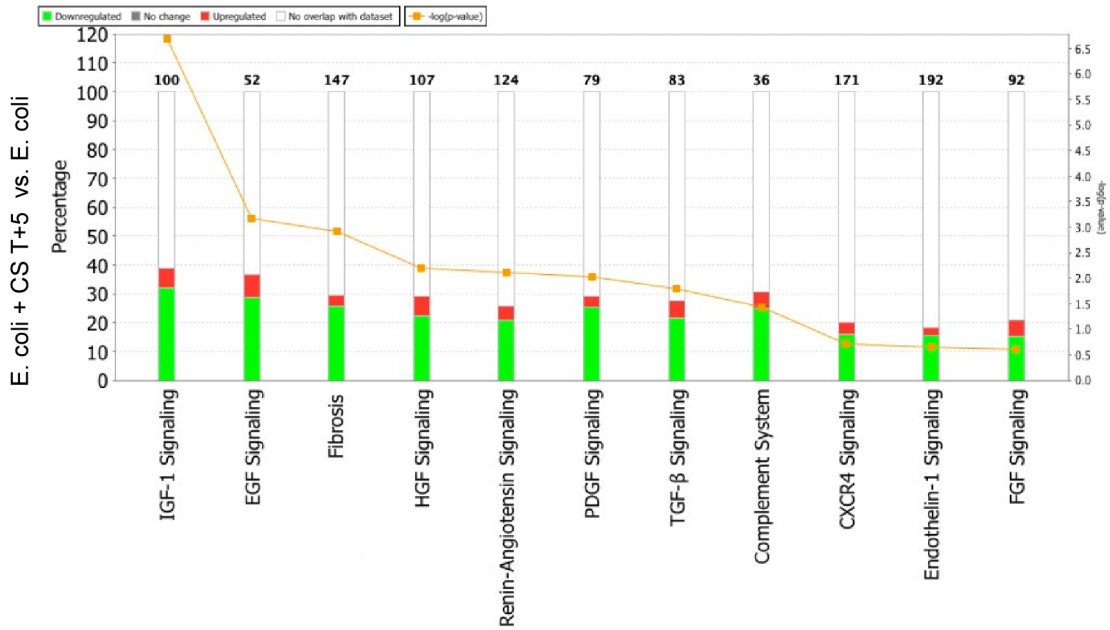

**Figure E2: Canonical pathways up-regulated by sepsis (A) and down-regulated by complementin treatment of septic baboons.**

The stacked bar chart displays the percentage of upregulated (red) and down-regulated (green) genes in each canonical pathway, out of the total molecules that make each pathway, shown above each column. Y axis shows the  $-\log p\text{-values}$ , as calculated by Fisher's exact test right-tailed.



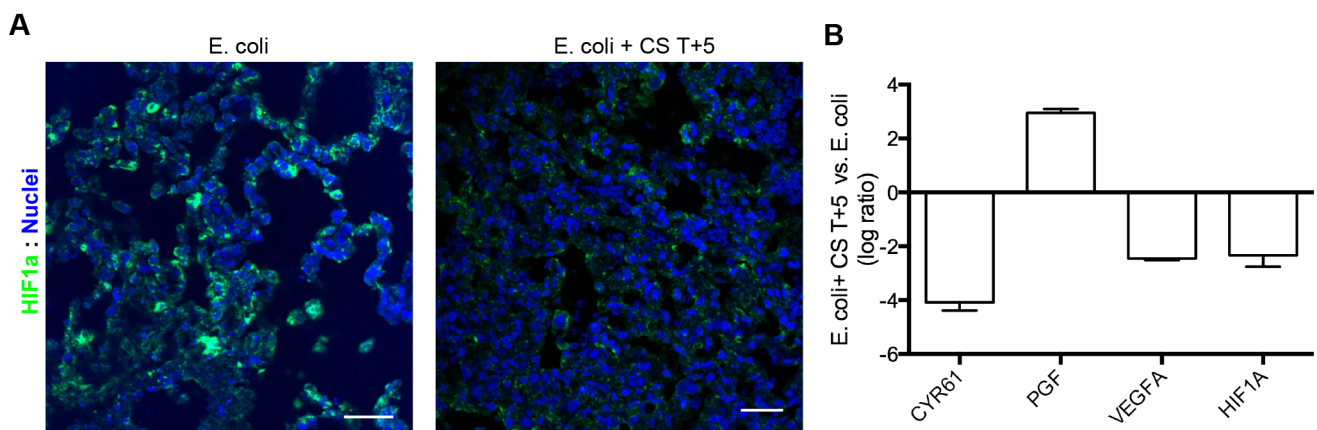

**Figure E4: Compstatin treatment downregulates sepsis induced hypoxia.**

(A): Immunofluorescence microscopy shows strong HIF1a staining in the lung of non-treated animals (E. coli) but not in the animals treated with compstatin during the second stage (E coli +CS T + 5). Magnification bar, 50 $\mu$ m. B: Log ratio representation of angiogenic proteins expression in compstatin treated group (E coli +CS T + 5) vs. non-treated septic animals (E. coli) shows that besides HIF1a, the angiogenic molecules VEGF and CYR61 are decreased while PGF expression is increased. Data are shown as log ratio mean  $\pm$  SEM of 3 biological replicates.

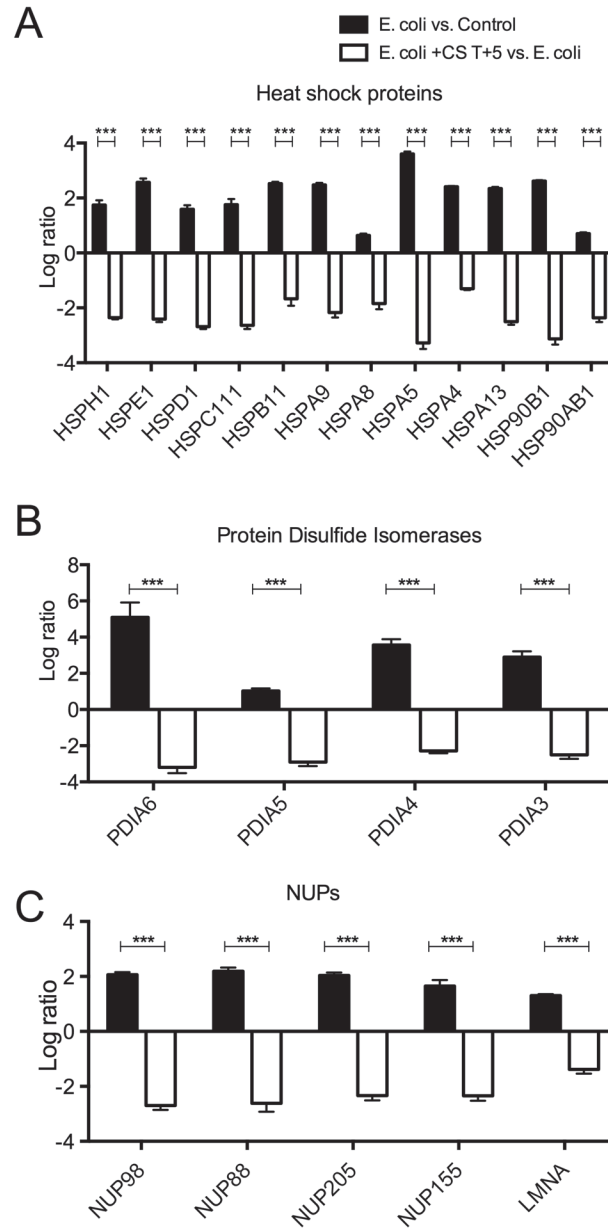

**Figure E5: Expression of cellular stress response genes.**

Log ratio representation of microarray data show that sepsis (*E. coli* vs. control) increased the expression of heat shock proteins (A), protein disulfide isomerases (B) and nuclear pore proteins (NUPs; C), while compstatin treatment consistently decreased these genes. Data are shown as log ratio mean  $\pm$  SEM of 3 biological replicates. Multiple t test with Holm-Sidak multiple comparisons correction. \*\*\* $P < 0.001$ .







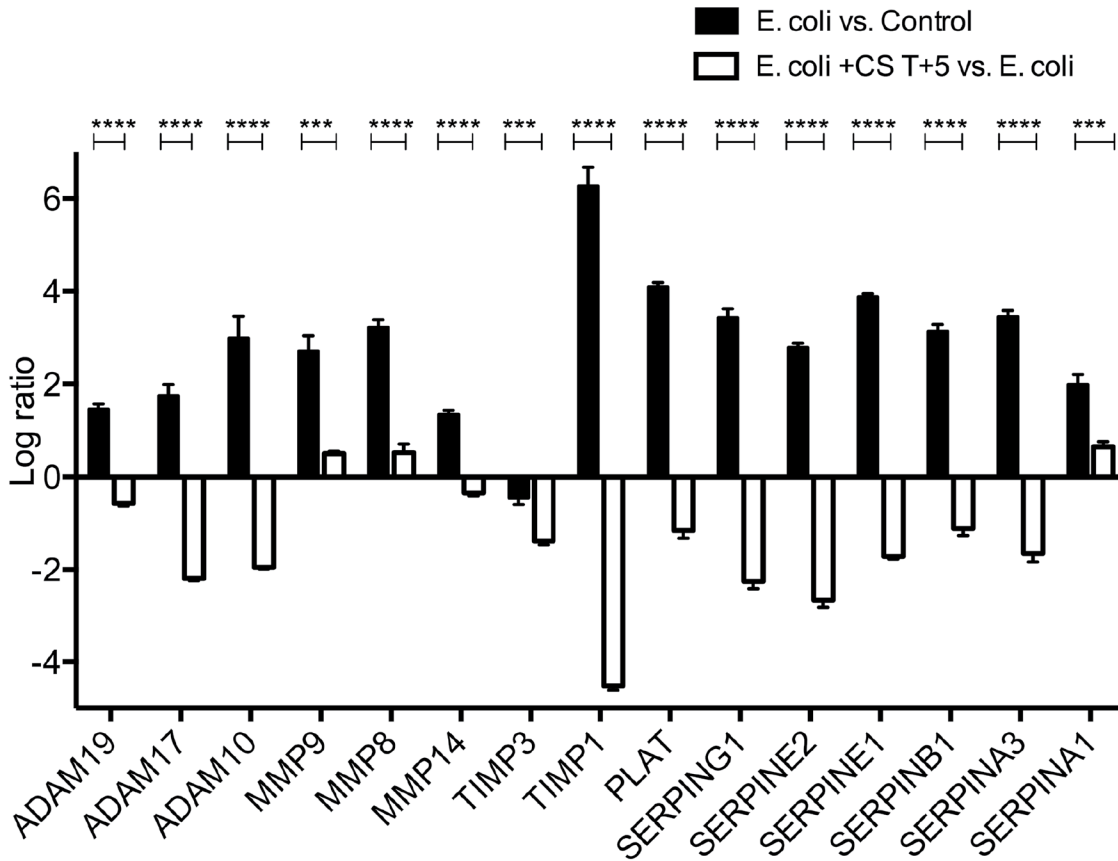

**Figure E8: Expression of genes involved in extracellular matrix remodeling.**

Log ratio of microarray data showing that compstatin treatment downregulated the expression of extracellular proteases and serine protease inhibitors induced by *E. coli* sepsis. Data are shown as log ratio mean $\pm$ SEM of 3 biological replicates. Multiple t test with Holm-Sidak multiple comparisons correction. \*\*\*P<0.001; \*\*\*\*P<0.001.

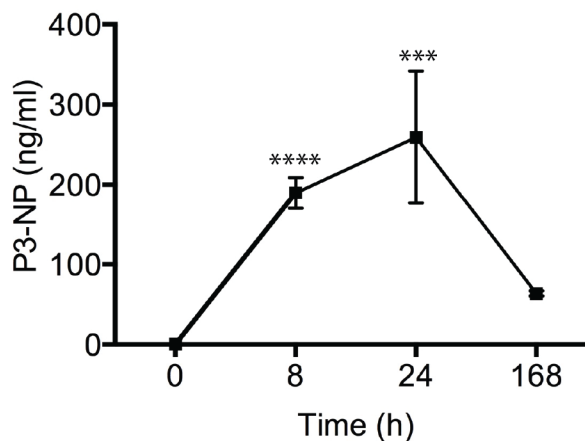

**Figure E9: Time course of procollagen 3 N-terminal peptide levels in plasma of baboons challenged with LD50 *E. coli*.**

Data are shown as mean $\pm$ SEM; n=4 biological replicates per time-point; One-way ANOVA with Dunnett multicomparison test; \*\*\*\*P <0.0001; \*\*\*P <0.001 as compared to T0 group.
